# Supplementary material for: Mass Cytometry Study on Hepatic Fibrosis and Its Drug-Induced Recovery Using Mouse Peripheral Blood Mononuclear Cells
Source: Front Immunol. 2022 Feb 9;13:814030. doi: 10.3389/fimmu.2022.814030 (PMC8863676; doi:10.3389/fimmu.2022.814030)
Supplement: Supplementary file 2 [file DataSheet_2.docx]

Mass cytometry study on hepatic fibrosis and its drug induced recovery using mouse peripheral blood mononuclear cells

Jiwon Bae1, Ji Eun Kim2 Haribalan Perumalsamy3, Sehee Park1, Yun Kim4,5, Dae Won Jun2,4,5 ,6*, Tae-Hyun Yoon1,3,7,8,*

1Department of Chemistry, College of Natural Sciences, Hanyang University, Seoul 04763, Republic of Korea

2Department of Internal Medicine, Hanyang University Hospital, Seoul, 04763, Republic of Korea

3Research Institute for Convergence of Basic Science, Hanyang University, Seoul 04763, Republic of Korea

4Hanyang Medicine-Engineering-Bio Collaborative & Comprehensive Center for drug development, Hanyang University, Seoul, Korea

5Department of Clinical Pharmacology and Therapeutics, Hanyang University Hospital, Seoul, 04763, Republic of Korea

6Department of Medical and Digital Engineering, College of Engineering, Hanyang University, Seoul 04763, Republic of Korea

7Institute of Next Generation Material Design, Hanyang University, Seoul 04763, Republic of Korea

8Yoon Idea Lab. Co. Ltd, Seoul 04763, Republic of Korea

*** Correspondence:**Corresponding Author
[taeyoon@hanyang.ac.kr](mailto:taeyoon@hanyang.ac.kr), [noshin@hanyang.ac.kr](mailto:noshin@hanyang.ac.kr)

**Tables S1**. Cellular abundances of the manually-gated immune cells for the NC, TAA, and Drug mice groups

|  | **NC1*** | **NC2** | **NC4** | **NC5** | **NC6** | **NC7** | **NC8*** | **Average** |
| --- | --- | --- | --- | --- | --- | --- | --- | --- |
| **Granulocytes** | 0.73 | 0.17 | 0.13 | 0.05 | 0.10 | 0.15 | 0.14 | 0.12 |
| **Monocytes** | 15.85 | 5.69 | 5.42 | 3.47 | 1.50 | 6.60 | 4.02 | 4.54 |
| **DCs** | 2.20 | 5.66 | 3.94 | 3.16 | 1.95 | 2.04 | 5.16 | 3.35 |
| **NK cell** | 20.73 | 19.83 | 22.49 | 18.28 | 8.82 | 14.75 | 42.75 | 16.83 |
| **Memory CD4+ T cell** | 0.49 | 1.08 | 1.36 | 1.28 | 1.72 | 1.46 | 1.15 | 1.38 |
| **Effector CD4+ T cell** | 12.20 | 8.74 | 6.74 | 7.08 | 5.67 | 5.21 | 7.46 | 6.69 |
| **Naïve CD4+ T cell** | 0.24 | 7.17 | 5.11 | 3.51 | 10.05 | 7.35 | 0.29 | 6.64 |
| **Memory CD8+ T cell** | 0.49 | 4.19 | 5.76 | 9.01 | 9.84 | 8.10 | 6.31 | 7.38 |
| **Effector CD8+ T cell** | 0.49 | 1.70 | 1.29 | 2.30 | 0.85 | 1.44 | 1.87 | 1.52 |
| **Naïve CD8+ T cell** | 0.49 | 3.21 | 2.18 | 1.85 | 7.87 | 3.43 | 0.72 | 3.71 |
| **B cell** | 1.71 | 17.74 | 18.45 | 16.89 | 33.77 | 30.49 | 7.03 | 23.47 |
| SUM | 55.61 | 75.18 | 72.88 | 66.89 | 82.15 | 81.03 | 76.90 |  |

|  | **TAA1** | **TAA2** | **TAA3** | **TAA4** | **TAA5** | **TAA6** | **TAA7**** | **TAA8** | **Average** | **TAA-NC** |
| --- | --- | --- | --- | --- | --- | --- | --- | --- | --- | --- |
| **Granulocytes** | 0.19 | 0.09 | 0.27 | 0.23 | 0.13 | 0.06 | 0.03 | 0.10 | 0.15 | 0.02 |
| **Monocytes** | 2.89 | 7.22 | 4.31 | 8.05 | 5.79 | 7.01 | 7.65 | 10.51 | 6.54 | 2.12 |
| **DCs** | 1.10 | 4.63 | 1.45 | 4.04 | 3.06 | 3.19 | 13.88 | 7.68 | 3.59 | 0.15 |
| **NK cell** | 5.31 | 3.95 | 1.49 | 11.24 | 3.37 | 3.34 | 9.12 | 5.10 | 4.83 | -12.08 |
| **Memory CD4+ T cell** | 0.69 | 1.01 | 0.66 | 0.45 | 0.53 | 0.32 | 2.08 | 0.66 | 0.62 | -0.76 |
| **Effector CD4+ T cell** | 2.61 | 3.79 | 1.52 | 2.66 | 2.54 | 2.42 | 12.32 | 2.92 | 2.64 | -4.00 |
| **Naïve CD4+ T cell** | 10.47 | 9.22 | 7.96 | 6.91 | 6.83 | 4.15 | 0.58 | 5.40 | 7.28 | 0.56 |
| **Memory CD8+ T cell** | 3.27 | 2.13 | 1.76 | 1.80 | 0.42 | 0.37 | 0.42 | 1.68 | 1.63 | -5.79 |
| **Effector CD8+ T cell** | 1.29 | 1.24 | 0.49 | 0.57 | 0.56 | 0.49 | 2.88 | 0.89 | 0.79 | -0.67 |
| **Naïve CD8+ T cell** | 3.65 | 3.79 | 1.76 | 2.23 | 1.84 | 0.67 | 0.10 | 2.11 | 2.29 | -1.41 |
| **B cell** | 48.14 | 42.68 | 70.76 | 46.28 | 35.68 | 31.20 | 12.57 | 37.62 | 44.62 | 21.24 |
| SUM | 79.62 | 79.75 | 92.43 | 84.45 | 60.77 | 53.22 | 61.61 | 74.67 |  |  |

|  | **Drug1** | **Drug2** | **Drug3** | **Drug4** | **Drug5** | **Drug6** | **Drug7** | **Drug8** | **Average** | **Drug-NC** |
| --- | --- | --- | --- | --- | --- | --- | --- | --- | --- | --- |
| **Granulocytes** | 0.12 | 0.48 | 0.09 | 0.06 | 0.13 | 0.19 | 0.17 | 0.11 | 0.17 | 0.05 |
| **Monocytes** | 5.60 | 11.64 | 16.70 | 4.18 | 4.19 | 7.10 | 8.86 | 4.47 | 7.84 | 3.31 |
| **DCs** | 14.90 | 8.31 | 17.31 | 5.90 | 3.63 | 6.82 | 6.90 | 2.45 | 8.28 | 4.93 |
| **NK cell** | 13.64 | 9.33 | 8.37 | 10.31 | 9.52 | 9.60 | 7.00 | 5.34 | 9.14 | -7.69 |
| **Memory CD4+ T cell** | 0.31 | 0.23 | 1.19 | 0.86 | 0.48 | 1.61 | 0.51 | 0.53 | 0.71 | -0.67 |
| **Effector CD4+ T cell** | 3.07 | 3.22 | 8.72 | 3.92 | 2.42 | 6.16 | 3.13 | 4.03 | 4.33 | -2.36 |
| **Naïve CD4+ T cell** | 0.94 | 1.14 | 0.82 | 3.02 | 4.60 | 8.42 | 2.85 | 1.31 | 2.89 | -3.75 |
| **Memory CD8+ T cell** | 0.51 | 0.49 | 0.99 | 2.02 | 4.15 | 7.19 | 1.35 | 0.59 | 2.16 | -5.22 |
| **Effector CD8+ T cell** | 0.77 | 0.70 | 1.18 | 0.72 | 0.63 | 1.39 | 0.70 | 0.48 | 0.82 | -0.70 |
| **Naïve CD8+ T cell** | 0.24 | 0.52 | 0.22 | 1.37 | 2.40 | 3.98 | 1.38 | 0.27 | 1.30 | -2.41 |
| **B cell** | 39.48 | 34.69 | 19.35 | 53.86 | 47.89 | 24.31 | 44.91 | 52.35 | 39.60 | 16.14 |
| SUM | 79.58 | 70.76 | 74.93 | 86.22 | 80.04 | 76.78 | 77.76 | 71.93 |  |  |

* : Exclude for statistics due to the low number of leukocytes(<1000 cells)

** : Exclude for outlier

**Table S2.** Cellular abundances of the 29 PhenoGraph clusters for the NC, TAA, and Drug mice groups

| **Cluster #** | **Cell type** | **Samples** | | | | | | | |
| --- | --- | --- | --- | --- | --- | --- | --- | --- | --- |
| NC1* | NC2 | NC4 | NC5 | NC6 | NC7 | NC8* | Average |
| Cluster1 | B cell | 3.41 | 3.16 | 4.03 | 5.08 | 3.76 | 2.41 | 1.58 | 3.69 |
| Cluster2 | B cell | 0.00 | 7.25 | 6.16 | 4.63 | 17.27 | 16.95 | 2.58 | 10.45 |
| Cluster3 | B cell | 0.00 | 3.01 | 2.61 | 3.02 | 7.45 | 6.56 | 1.00 | 4.53 |
| Cluster4 | CD4+ T cell | 2.20 | 11.17 | 7.68 | 6.17 | 12.56 | 8.44 | 0.86 | 9.21 |
| Cluster5 | B cell | 1.22 | 3.99 | 5.26 | 4.98 | 4.07 | 2.83 | 2.01 | 4.23 |
| Cluster6 | CD8+ T cell | 7.56 | 7.20 | 9.94 | 21.40 | 15.73 | 11.00 | 9.18 | 13.05 |
| Cluster7 | monocyte | 1.46 | 6.68 | 4.65 | 2.52 | 1.68 | 6.70 | 4.30 | 4.45 |
| Cluster8 | NK cell | 25.85 | 12.11 | 14.34 | 10.80 | 4.56 | 7.50 | 24.39 | 9.86 |
| Cluster9 | DC | 3.41 | 6.07 | 3.79 | 1.75 | 1.28 | 2.32 | 4.45 | 3.04 |
| Cluster10 | NK cell | 18.54 | 12.20 | 15.60 | 15.83 | 6.67 | 10.00 | 29.12 | 12.06 |
| Cluster11 | CD4+ T cell | 14.63 | 9.27 | 7.57 | 8.57 | 7.07 | 5.91 | 8.75 | 7.68 |
| Cluster12 | B cell | 4.39 | 1.14 | 2.34 | 1.67 | 1.05 | 4.19 | 0.86 | 2.08 |
| Cluster13 | CD8+ T cell | 0.98 | 3.44 | 3.22 | 2.11 | 4.75 | 3.19 | 3.59 | 3.34 |
| Cluster14 | Ungated | 7.80 | 5.01 | 5.43 | 5.29 | 3.17 | 3.14 | 2.01 | 4.41 |
| Cluster15 | CD8+ T cell | 0.73 | 2.19 | 1.52 | 1.45 | 4.01 | 1.97 | 0.43 | 2.23 |
| Cluster16 | Ungated | 1.46 | 1.28 | 1.41 | 1.14 | 1.04 | 1.34 | 1.29 | 1.24 |
| Cluster17 | CD4+ T cell | 0.49 | 1.22 | 0.91 | 0.96 | 1.14 | 0.74 | 0.14 | 0.99 |
| Cluster18 | B cell | 0.24 | 0.39 | 0.48 | 0.20 | 0.48 | 0.73 | 0.14 | 0.45 |
| Cluster19 | ungated | 0.73 | 0.82 | 0.78 | 0.80 | 0.45 | 0.71 | 1.43 | 0.71 |
| Cluster20 | Monocytes | 0.00 | 0.00 | 0.00 | 0.01 | 0.00 | 0.72 | 0.00 | 0.15 |
| Cluster21 | ungated | 1.95 | 0.78 | 0.66 | 0.27 | 0.13 | 0.50 | 0.72 | 0.47 |
| Cluster22 | Monocyte | 0.00 | 0.03 | 0.17 | 0.05 | 0.12 | 0.46 | 0.00 | 0.17 |
| Cluster23 | CD4+ T cell | 0.73 | 0.39 | 0.33 | 0.39 | 0.33 | 0.33 | 0.29 | 0.35 |
| Cluster24 | Granulocyte | 0.98 | 0.24 | 0.27 | 0.07 | 0.23 | 0.23 | 0.14 | 0.21 |
| Cluster25 | ungated | 0.49 | 0.43 | 0.41 | 0.39 | 0.33 | 0.34 | 0.00 | 0.38 |
| Cluster26 | B cell | 0.00 | 0.10 | 0.08 | 0.13 | 0.28 | 0.32 | 0.00 | 0.18 |
| Cluster27 | CD4+ T cell | 0.73 | 0.30 | 0.27 | 0.22 | 0.22 | 0.18 | 0.57 | 0.24 |
| Cluster28 | B cell | 0.00 | 0.04 | 0.02 | 0.06 | 0.12 | 0.06 | 0.00 | 0.06 |
| Cluster29 | B cell | 0.00 | 0.10 | 0.06 | 0.05 | 0.04 | 0.25 | 0.14 | 0.10 |

| **Cluster #** | **Cell type** | **Samples** | | | | | | | | |  |
| --- | --- | --- | --- | --- | --- | --- | --- | --- | --- | --- | --- |
| TAA1 | TAA2 | TAA3 | TAA4 | TAA5 | TAA6 | TAA7** | TAA8 | Average | TAA-NC |
| Cluster1 | B cell | 21.23 | 15.50 | 8.88 | 13.45 | 28.64 | 33.92 | 11.02 | 13.87 | 19.35 | 15.67 |
| Cluster2 | B cell | 10.06 | 10.58 | 25.76 | 11.74 | 1.95 | 0.25 | 0.80 | 8.08 | 9.78 | -0.68 |
| Cluster3 | B cell | 12.03 | 13.40 | 32.48 | 17.64 | 2.46 | 0.83 | 1.76 | 11.62 | 12.92 | 8.39 |
| Cluster4 | CD4+ T cell | 16.27 | 12.51 | 8.42 | 8.82 | 15.72 | 14.97 | 1.60 | 7.26 | 12.00 | 2.79 |
| Cluster5 | B cell | 5.42 | 3.55 | 1.79 | 3.50 | 9.60 | 9.96 | 1.12 | 4.13 | 5.42 | 1.20 |
| Cluster6 | CD8+ T cell | 5.42 | 6.83 | 2.56 | 3.49 | 3.85 | 3.14 | 2.24 | 3.46 | 4.11 | -8.94 |
| Cluster7 | monocyte | 2.83 | 7.65 | 4.04 | 8.92 | 2.75 | 2.89 | 7.19 | 9.74 | 5.54 | 1.10 |
| Cluster8 | NK cell | 3.77 | 2.60 | 1.21 | 7.89 | 3.17 | 6.00 | 15.50 | 3.50 | 4.02 | -5.84 |
| Cluster9 | DC | 1.10 | 5.72 | 1.38 | 3.34 | 5.66 | 4.48 | 10.38 | 9.10 | 4.40 | 1.35 |
| Cluster10 | NK cell | 2.67 | 1.50 | 0.92 | 4.90 | 1.91 | 2.59 | 5.91 | 1.96 | 2.35 | -9.71 |
| Cluster11 | CD4+ T cell | 3.77 | 4.37 | 1.61 | 3.37 | 3.79 | 4.02 | 16.13 | 3.58 | 3.50 | -4.17 |
| Cluster12 | B cell | 1.57 | 2.95 | 1.91 | 1.90 | 5.52 | 4.54 | 9.11 | 11.11 | 4.21 | 2.14 |
| Cluster13 | CD8+ T cell | 2.67 | 2.99 | 1.17 | 1.64 | 3.10 | 2.81 | 7.03 | 2.34 | 2.39 | -0.95 |
| Cluster14 | Ungated | 1.42 | 2.33 | 0.90 | 1.52 | 1.71 | 1.68 | 2.72 | 1.75 | 1.61 | -2.79 |
| Cluster15 | CD8+ T cell | 4.01 | 2.43 | 1.17 | 1.63 | 2.27 | 1.21 | 0.48 | 1.57 | 2.04 | -0.18 |
| Cluster16 | Ungated | 1.10 | 0.94 | 1.16 | 1.10 | 1.07 | 1.29 | 1.60 | 1.21 | 1.12 | -0.12 |
| Cluster17 | CD4+ T cell | 2.44 | 1.98 | 1.20 | 2.54 | 4.37 | 2.97 | 0.32 | 1.46 | 2.42 | 1.43 |
| Cluster18 | B cell | 0.63 | 0.54 | 0.96 | 0.49 | 0.60 | 0.44 | 0.16 | 0.91 | 0.65 | 0.20 |
| Cluster19 | ungated | 0.24 | 0.28 | 0.20 | 0.46 | 0.32 | 0.39 | 0.32 | 0.47 | 0.34 | -0.38 |
| Cluster20 | Monocytes | 0.00 | 0.02 | 0.02 | 0.00 | 0.06 | 0.30 | 0.48 | 1.28 | 0.24 | 0.09 |
| Cluster21 | ungated | 0.00 | 0.22 | 0.11 | 0.30 | 0.13 | 0.11 | 1.28 | 0.26 | 0.16 | -0.31 |
| Cluster22 | Monocyte | 0.00 | 0.10 | 0.96 | 0.05 | 0.13 | 0.00 | 0.16 | 0.26 | 0.21 | 0.05 |
| Cluster23 | CD4+ T cell | 0.31 | 0.19 | 0.19 | 0.23 | 0.35 | 0.39 | 0.96 | 0.24 | 0.27 | -0.08 |
| Cluster24 | Granulocyte | 0.16 | 0.16 | 0.20 | 0.28 | 0.18 | 0.17 | 0.16 | 0.15 | 0.19 | -0.02 |
| Cluster25 | ungated | 0.16 | 0.19 | 0.16 | 0.35 | 0.22 | 0.14 | 0.32 | 0.24 | 0.21 | -0.17 |
| Cluster26 | B cell | 0.24 | 0.15 | 0.23 | 0.17 | 0.22 | 0.28 | 0.00 | 0.19 | 0.21 | 0.03 |
| Cluster27 | CD4+ T cell | 0.39 | 0.22 | 0.12 | 0.15 | 0.24 | 0.28 | 1.12 | 0.17 | 0.22 | -0.02 |
| Cluster28 | B cell | 0.00 | 0.04 | 0.13 | 0.08 | 0.01 | 0.00 | 0.00 | 0.03 | 0.04 | -0.02 |
| Cluster29 | B cell | 0.08 | 0.05 | 0.16 | 0.04 | 0.00 | 0.00 | 0.16 | 0.05 | 0.05 | -0.05 |

| **Cluster #** | **Cell type** | **Samples** | | | | | | | | |  |
| --- | --- | --- | --- | --- | --- | --- | --- | --- | --- | --- | --- |
| Drug1 | Drug2 | Drug3 | Drug4 | Drug5 | Drug6 | Drug7 | Drug8 | Average | Drug-NC |
| Cluster1 | B cell | 27.50 | 29.35 | 14.17 | 22.79 | 12.49 | 7.37 | 17.32 | 27.47 | 19.81 | 16.12 |
| Cluster2 | B cell | 2.19 | 1.19 | 1.28 | 8.60 | 13.15 | 5.47 | 5.03 | 5.37 | 5.28 | -5.17 |
| Cluster3 | B cell | 3.90 | 2.76 | 2.17 | 14.93 | 8.53 | 3.60 | 3.97 | 3.64 | 5.44 | 0.91 |
| Cluster4 | CD4+ T cell | 3.05 | 2.56 | 2.46 | 4.42 | 5.10 | 10.56 | 5.25 | 2.89 | 4.54 | -4.67 |
| Cluster5 | B cell | 9.27 | 7.73 | 4.11 | 6.87 | 14.83 | 9.25 | 21.81 | 29.83 | 12.96 | 8.73 |
| Cluster6 | CD8+ T cell | 2.94 | 2.35 | 3.68 | 4.18 | 6.05 | 12.24 | 2.90 | 2.25 | 4.57 | -8.48 |
| Cluster7 | monocyte | 7.37 | 8.52 | 22.87 | 5.42 | 3.42 | 6.22 | 8.30 | 2.18 | 8.04 | 3.59 |
| Cluster8 | NK cell | 8.74 | 4.90 | 5.78 | 7.74 | 7.64 | 7.05 | 6.09 | 5.70 | 6.71 | -3.16 |
| Cluster9 | DC | 14.51 | 14.52 | 13.47 | 4.25 | 3.70 | 9.95 | 8.88 | 2.60 | 8.98 | 5.94 |
| Cluster10 | NK cell | 7.54 | 3.74 | 6.62 | 5.28 | 4.58 | 3.27 | 3.64 | 3.13 | 4.72 | -7.33 |
| Cluster11 | CD4+ T cell | 4.47 | 4.38 | 12.31 | 4.80 | 3.00 | 7.57 | 4.02 | 4.53 | 5.64 | -2.04 |
| Cluster12 | B cell | 1.41 | 7.58 | 1.86 | 0.83 | 5.06 | 1.66 | 2.57 | 2.07 | 2.88 | 0.80 |
| Cluster13 | CD8+ T cell | 1.12 | 1.62 | 1.21 | 1.69 | 2.04 | 3.16 | 2.14 | 1.00 | 1.75 | -1.60 |
| Cluster14 | Ungated | 1.31 | 1.33 | 2.75 | 1.74 | 1.87 | 2.79 | 1.38 | 1.50 | 1.83 | -2.57 |
| Cluster15 | CD8+ T cell | 0.40 | 0.42 | 0.40 | 1.20 | 1.92 | 3.46 | 1.19 | 0.41 | 1.18 | -1.05 |
| Cluster16 | Ungated | 1.36 | 1.54 | 1.27 | 1.98 | 1.80 | 1.46 | 1.43 | 1.62 | 1.56 | 0.32 |
| Cluster17 | CD4+ T cell | 0.72 | 0.86 | 0.68 | 0.92 | 0.95 | 1.54 | 1.14 | 0.69 | 0.94 | -0.05 |
| Cluster18 | B cell | 0.53 | 0.71 | 0.39 | 0.93 | 1.09 | 0.73 | 0.65 | 1.01 | 0.76 | 0.30 |
| Cluster19 | ungated | 0.55 | 0.42 | 0.76 | 0.30 | 0.49 | 0.73 | 0.44 | 0.28 | 0.50 | -0.21 |
| Cluster20 | Monocytes | 0.21 | 2.14 | 0.00 | 0.00 | 0.57 | 0.16 | 0.27 | 0.04 | 0.42 | 0.28 |
| Cluster21 | ungated | 0.21 | 0.34 | 0.97 | 0.26 | 0.14 | 0.17 | 0.10 | 0.12 | 0.29 | -0.18 |
| Cluster22 | Monocyte | 0.00 | 0.02 | 0.03 | 0.00 | 0.15 | 0.06 | 0.02 | 0.03 | 0.04 | -0.13 |
| Cluster23 | CD4+ T cell | 0.10 | 0.12 | 0.19 | 0.22 | 0.17 | 0.43 | 0.19 | 0.15 | 0.19 | -0.16 |
| Cluster24 | Granulocyte | 0.29 | 0.67 | 0.19 | 0.17 | 0.24 | 0.30 | 0.31 | 0.22 | 0.30 | 0.09 |
| Cluster25 | ungated | 0.07 | 0.05 | 0.06 | 0.17 | 0.13 | 0.18 | 0.14 | 0.13 | 0.12 | -0.26 |
| Cluster26 | B cell | 0.02 | 0.01 | 0.00 | 0.02 | 0.37 | 0.18 | 0.39 | 0.44 | 0.18 | 0.00 |
| Cluster27 | CD4+ T cell | 0.04 | 0.10 | 0.23 | 0.15 | 0.16 | 0.27 | 0.14 | 0.11 | 0.15 | -0.09 |
| Cluster28 | B cell | 0.11 | 0.03 | 0.05 | 0.10 | 0.28 | 0.14 | 0.27 | 0.54 | 0.19 | 0.13 |
| Cluster29 | B cell | 0.08 | 0.06 | 0.05 | 0.05 | 0.07 | 0.04 | 0.01 | 0.02 | 0.05 | -0.05 |

* : Exclude for statistics due to the low number of leukocytes(<1000 cells)

** : Exclude for outlier

**Table S3.** Cellular abundances of the 29 FlowSOM clusters for the NC, TAA, and Drug mice groups

| **Cluster #** | **Cell type** | **Samples** | | | | | | | |
| --- | --- | --- | --- | --- | --- | --- | --- | --- | --- |
| NC1* | NC2 | NC4 | NC5 | NC6 | NC7 | NC8* | Average |
| Cluster1 | NK cell & DCs | 27.80 | 18.71 | 21.12 | 19.09 | 8.76 | 15.96 | 32.71 | 16.73 |
| Cluster2 | Monocyte | 0.00 | 0.01 | 0.01 | 0.02 | 0.02 | 0.51 | 0.00 | 0.11 |
| Cluster3 | Monocyte | 1.22 | 7.40 | 5.21 | 2.58 | 1.91 | 7.60 | 4.16 | 4.94 |
| Cluster4 | Granulocyte | 0.98 | 0.22 | 0.24 | 0.07 | 0.19 | 0.23 | 0.14 | 0.19 |
| Cluster5 | CD8+ T cell | 7.56 | 7.93 | 10.10 | 20.91 | 16.70 | 11.42 | 9.18 | 13.41 |
| Cluster6 | NK cell | 32.20 | 13.73 | 16.34 | 12.46 | 5.05 | 8.54 | 27.55 | 11.22 |
| Cluster7 | CD4+ T cells | 5.12 | 5.37 | 6.07 | 6.15 | 4.55 | 4.08 | 2.44 | 5.24 |
| Cluster8 | CD8+ T cell | 0.00 | 1.00 | 0.57 | 0.63 | 1.85 | 0.68 | 0.00 | 0.95 |
| Cluster9 | B cell | 4.15 | 17.66 | 18.39 | 17.92 | 33.09 | 29.63 | 7.60 | 23.34 |
| Cluster10 | Unassigned | 0.49 | 0.40 | 0.49 | 0.55 | 0.32 | 0.44 | 0.72 | 0.44 |
| Cluster11 | CD8+ T cell | 0.73 | 3.42 | 2.78 | 1.92 | 4.77 | 3.18 | 3.44 | 3.21 |
| Cluster12 | B cell | 1.22 | 0.77 | 0.78 | 0.52 | 0.59 | 0.72 | 0.43 | 0.68 |
| Cluster13 | Unassigned | 0.24 | 0.30 | 0.33 | 0.25 | 0.24 | 0.26 | 0.00 | 0.28 |
| Cluster14 | CD4+ T cells | 2.93 | 12.17 | 8.17 | 7.04 | 13.36 | 8.74 | 0.43 | 9.90 |
| Cluster15 | Unassigned | 0.00 | 0.04 | 0.01 | 0.02 | 0.03 | 0.06 | 0.14 | 0.03 |
| Cluster16 | CD4+ T cells | 0.49 | 0.37 | 0.35 | 0.35 | 0.33 | 0.31 | 0.43 | 0.34 |
| Cluster17 | B cell | 0.24 | 0.39 | 0.47 | 0.18 | 0.35 | 0.65 | 0.29 | 0.41 |
| Cluster18 | B cell | 0.98 | 0.36 | 0.32 | 0.28 | 0.29 | 0.34 | 0.57 | 0.32 |
| Cluster19 | Unassigned | 0.24 | 0.31 | 0.38 | 0.36 | 0.22 | 0.28 | 0.57 | 0.31 |
| Cluster20 | CD4+ T cells | 13.41 | 9.45 | 7.86 | 8.70 | 7.39 | 6.37 | 9.18 | 7.95 |

| **Cluster #** | **Cell type** | **Samples** | | | | | | | | |  |
| --- | --- | --- | --- | --- | --- | --- | --- | --- | --- | --- | --- |
| TAA1 | TAA2 | TAA3 | TAA4 | TAA5 | TAA6 | TAA7** | TAA8 | Average | TAA-NC |
| Cluster1 | NK cell & DCs | 5.30 | 9.74 | 4.63 | 9.95 | 12.96 | 13.23 | 27.64 | 20.93 | 10.96 | -5.77 |
| Cluster2 | Monocyte | 0.00 | 0.01 | 0.04 | 0.00 | 0.07 | 0.28 | 0.16 | 1.15 | 0.22 | 0.11 |
| Cluster3 | Monocyte | 3.16 | 8.54 | 5.22 | 9.59 | 3.41 | 3.00 | 7.83 | 11.27 | 6.31 | 1.37 |
| Cluster4 | Granulocyte | 0.16 | 0.14 | 0.19 | 0.27 | 0.17 | 0.11 | 0.16 | 0.13 | 0.17 | -0.02 |
| Cluster5 | CD8+ T cell | 7.04 | 7.57 | 3.01 | 4.10 | 4.41 | 3.22 | 1.92 | 4.10 | 4.78 | -8.63 |
| Cluster6 | NK cell | 3.96 | 3.43 | 1.38 | 8.55 | 4.01 | 7.73 | 17.57 | 4.34 | 4.77 | -6.45 |
| Cluster7 | CD4+ T cells | 1.50 | 2.73 | 1.17 | 1.74 | 1.60 | 0.85 | 2.40 | 1.72 | 1.62 | -3.63 |
| Cluster8 | CD8+ T cell | 2.14 | 1.02 | 0.48 | 0.81 | 1.59 | 0.80 | 0.32 | 0.74 | 1.08 | 0.14 |
| Cluster9 | B cell | 48.73 | 42.90 | 68.96 | 46.25 | 42.56 | 44.13 | 13.90 | 38.17 | 47.39 | 24.05 |
| Cluster10 | Unassigned | 0.32 | 0.19 | 0.12 | 0.23 | 0.14 | 0.25 | 0.00 | 0.18 | 0.20 | -0.24 |
| Cluster11 | CD8+ T cell | 2.77 | 3.00 | 1.18 | 1.66 | 3.02 | 2.39 | 6.71 | 2.26 | 2.33 | -0.89 |
| Cluster12 | B cell | 0.71 | 0.69 | 0.94 | 0.77 | 0.83 | 0.91 | 1.44 | 0.93 | 0.83 | 0.15 |
| Cluster13 | Unassigned | 0.08 | 0.12 | 0.08 | 0.24 | 0.25 | 0.30 | 0.16 | 0.17 | 0.18 | -0.10 |
| Cluster14 | CD4+ T cells | 18.59 | 14.13 | 9.49 | 11.27 | 19.88 | 17.63 | 1.76 | 8.65 | 14.23 | 4.34 |
| Cluster15 | Unassigned | 0.00 | 0.02 | 0.03 | 0.02 | 0.08 | 0.06 | 0.16 | 0.03 | 0.03 | 0.00 |
| Cluster16 | CD4+ T cells | 0.40 | 0.18 | 0.18 | 0.22 | 0.34 | 0.36 | 0.80 | 0.24 | 0.27 | -0.07 |
| Cluster17 | B cell | 0.40 | 0.36 | 0.71 | 0.40 | 0.35 | 0.36 | 0.16 | 0.68 | 0.46 | 0.06 |
| Cluster18 | B cell | 0.32 | 0.36 | 0.29 | 0.31 | 0.45 | 0.36 | 0.64 | 0.40 | 0.35 | 0.04 |
| Cluster19 | Unassigned | 0.16 | 0.18 | 0.12 | 0.19 | 0.14 | 0.17 | 0.16 | 0.21 | 0.17 | -0.15 |
| Cluster20 | CD4+ T cells | 4.27 | 4.71 | 1.79 | 3.42 | 3.75 | 3.88 | 16.13 | 3.71 | 3.65 | -4.31 |

| **Cluster #** | **Cell type** | **Samples** | | | | | | | | |  |
| --- | --- | --- | --- | --- | --- | --- | --- | --- | --- | --- | --- |
| Drug1 | Drug2 | Drug3 | Drug4 | Drug5 | Drug6 | Drug7 | Drug8 | Average | Drug-NC |
| Cluster1 | NK cell & DCs | 22.97 | 26.11 | 21.23 | 10.13 | 13.24 | 13.96 | 14.77 | 8.52 | 16.37 | -0.36 |
| Cluster2 | Monocyte | 0.16 | 1.73 | 0.00 | 0.00 | 0.55 | 0.15 | 0.26 | 0.04 | 0.36 | 0.25 |
| Cluster3 | Monocyte | 8.04 | 9.18 | 23.77 | 5.76 | 4.00 | 7.59 | 9.15 | 2.44 | 8.74 | 3.80 |
| Cluster4 | Granulocyte | 0.28 | 0.65 | 0.19 | 0.13 | 0.18 | 0.29 | 0.27 | 0.19 | 0.27 | 0.08 |
| Cluster5 | CD8+ T cell | 2.71 | 2.25 | 3.53 | 4.53 | 7.07 | 13.83 | 3.22 | 2.22 | 4.92 | -8.49 |
| Cluster6 | NK cell | 10.20 | 6.58 | 8.85 | 8.74 | 8.73 | 7.92 | 7.21 | 6.73 | 8.12 | -3.11 |
| Cluster7 | CD4+ T cells | 0.98 | 0.79 | 1.98 | 1.69 | 1.72 | 2.99 | 1.19 | 1.10 | 1.55 | -3.69 |
| Cluster8 | CD8+ T cell | 0.29 | 0.29 | 0.19 | 0.62 | 0.76 | 1.46 | 0.70 | 0.22 | 0.57 | -0.38 |
| Cluster9 | B cell | 43.02 | 40.78 | 21.61 | 53.24 | 49.36 | 25.70 | 48.19 | 66.59 | 43.56 | 20.22 |
| Cluster10 | Unassigned | 0.28 | 0.14 | 0.49 | 0.27 | 0.32 | 0.50 | 0.27 | 0.18 | 0.31 | -0.13 |
| Cluster11 | CD8+ T cell | 0.93 | 1.35 | 0.90 | 1.65 | 1.96 | 3.16 | 2.02 | 0.85 | 1.60 | -1.61 |
| Cluster12 | B cell | 0.96 | 1.27 | 0.73 | 1.49 | 1.30 | 0.84 | 1.09 | 1.38 | 1.13 | 0.45 |
| Cluster13 | Unassigned | 0.09 | 0.06 | 0.08 | 0.12 | 0.10 | 0.14 | 0.08 | 0.09 | 0.10 | -0.18 |
| Cluster14 | CD4+ T cells | 3.78 | 3.41 | 3.11 | 5.24 | 6.01 | 11.80 | 6.42 | 3.56 | 5.42 | -4.48 |
| Cluster15 | Unassigned | 0.05 | 0.02 | 0.03 | 0.06 | 0.08 | 0.02 | 0.03 | 0.07 | 0.04 | 0.01 |
| Cluster16 | CD4+ T cells | 0.09 | 0.12 | 0.12 | 0.22 | 0.16 | 0.41 | 0.18 | 0.09 | 0.17 | -0.17 |
| Cluster17 | B cell | 0.48 | 0.51 | 0.32 | 0.83 | 0.83 | 0.54 | 0.48 | 0.71 | 0.59 | 0.18 |
| Cluster18 | B cell | 0.28 | 0.37 | 0.34 | 0.18 | 0.32 | 0.39 | 0.33 | 0.36 | 0.32 | 0.00 |
| Cluster19 | Unassigned | 0.17 | 0.13 | 0.43 | 0.20 | 0.30 | 0.41 | 0.20 | 0.17 | 0.25 | -0.06 |
| Cluster20 | CD4+ T cells | 4.23 | 4.26 | 12.11 | 4.91 | 3.01 | 7.89 | 3.93 | 4.50 | 5.61 | -2.35 |

* : Exclude for statistics due to the low number of leukocytes(<1000 cells)

** : Exclude for outlier

**Table S4. Comparison of T cell PhenoGraph clusters with manually gated population and associated marker expression**

| **Cell assignment** | **PhenoGraph Cluster** | **Marker expression** |
| --- | --- | --- |
| T cells | CD4+ T-PG#2 | Ly6Chigh CD62Lhigh TCR𝛽high CD69high CD11b_Mac-1high CD19mid CD3ehigh  F4_80mid CD206high CD4high CD44high |
| CD4+ T-PG#3 | Ly6Chigh CD62Lhigh TCR𝛽high CD69high CD11b_Mac-1high CD19mid CD3ehigh  F4_80mid CD206high CD4high CD44high |
| CD4+ T-PG#4 | Ly6Chigh CD62Lhigh TCR𝛽high CD69high CD11b_Mac-1high CD19mid CD3ehigh  F4_80mid CD206high CD4high CD44high |
| CD4+ T-PG#5 | TCR𝛽high CD69high CD11b_Mac-1high Ly_6G_C_Gr-1high CD19mid CD3ehigh  TER-119low F4_80mid CD206high CD4high CD44high |
| CD4+ T-PG#6 | Ly6Chigh NK.1mid CD11clow TCR𝛽high CD69high CD11b_Mac-1high CD19mid  CD3ehigh TER-119low F4_80mid CD206high CD4high CD44high |
| CD4+ T-PG#10 | Ly6Chigh CD62Lhigh TCR𝛽high CD69high CD11b_Mac-1high CD19mid CD3ehigh  F4_80mid CD206high CD4high |
| CD4+ T-PG#12 | Ly6Chigh NK.1mid CD62Lhigh CD11clow TCR𝛽high CD69high CD11b_Mac-1high  CD19mid CD3ehigh TER-119low F4_80mid CD206high CD4high CD44high |
| CD4+ T-PG#13 | Ly6Chigh NK.1mid CD62Lhigh CD11clow TCR𝛽high CD69high CD11b_Mac-1high  Ly_6G_C_Gr-1high CD19mid CD3ehigh F4_80mid CD206high CD4high CD44high |
| CD8+ T-PG#1 | Ly6Chigh CD8ahigh CD62Lhigh TCR𝛽high CD69high CD11b_Mac-1high CD19mid  CD3ehigh F4_80high CD206high CD4high CD44high |
| CD8+ T-PG#7 | CD62Lhigh TCR𝛽high CD69high CD11b_Mac-1high CD19mid CD3ehigh TER-119low F4_80mid CD206high CD4high CD44high |
| CD8+ T-PG#8 | Ly6Chigh CD8ahigh NK.1low CD62Lhigh TCR𝛽high CD69high CD11b_Mac-1high  CD19mid CD3ehigh F4_80high CD206high CD4high CD44high |
| CD8+ T-PG#9 | Ly6Chigh CD8ahigh CD11clow CD62Lhigh TCR𝛽high CD69high CD11b_Mac-1high  Ly_6G_C_Gr-1low CD19mid CD3ehigh TER-119low F4_80high CD206high CD44high |
|  | CD8+ T-PG#11 | Ly6Chigh CD8ahigh CD11clow CD62Lhigh TCR𝛽high CD69high CD11b_Mac-1high  CD19mid CD3ehigh TER-119low F4_80high CD206high CD44high |
